# Supplementary material for: Associations of Internet Use and Pregnancy Loss with Depression and Anxiety among Women in Bangladesh: Evidence from the 2022 BDHS
Source: Research Square preprint supplement (doi:10.21203/rs.3.rs-7546370/v1), 2025-09-19
Supplement: Supplementary file 1 [file 2e7025e1b502778c779c99b0.docx]

**Supplementary Fig. S1: Internet Use by Depression Category**


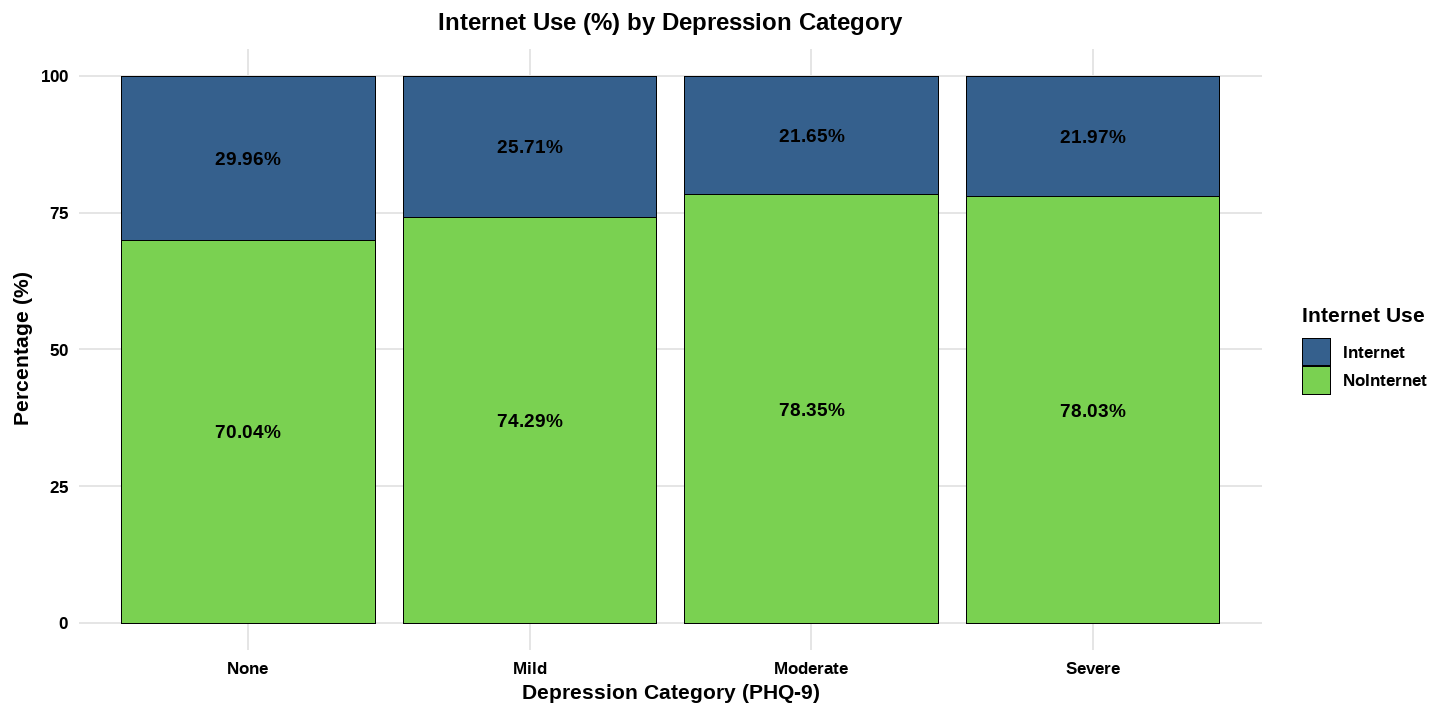


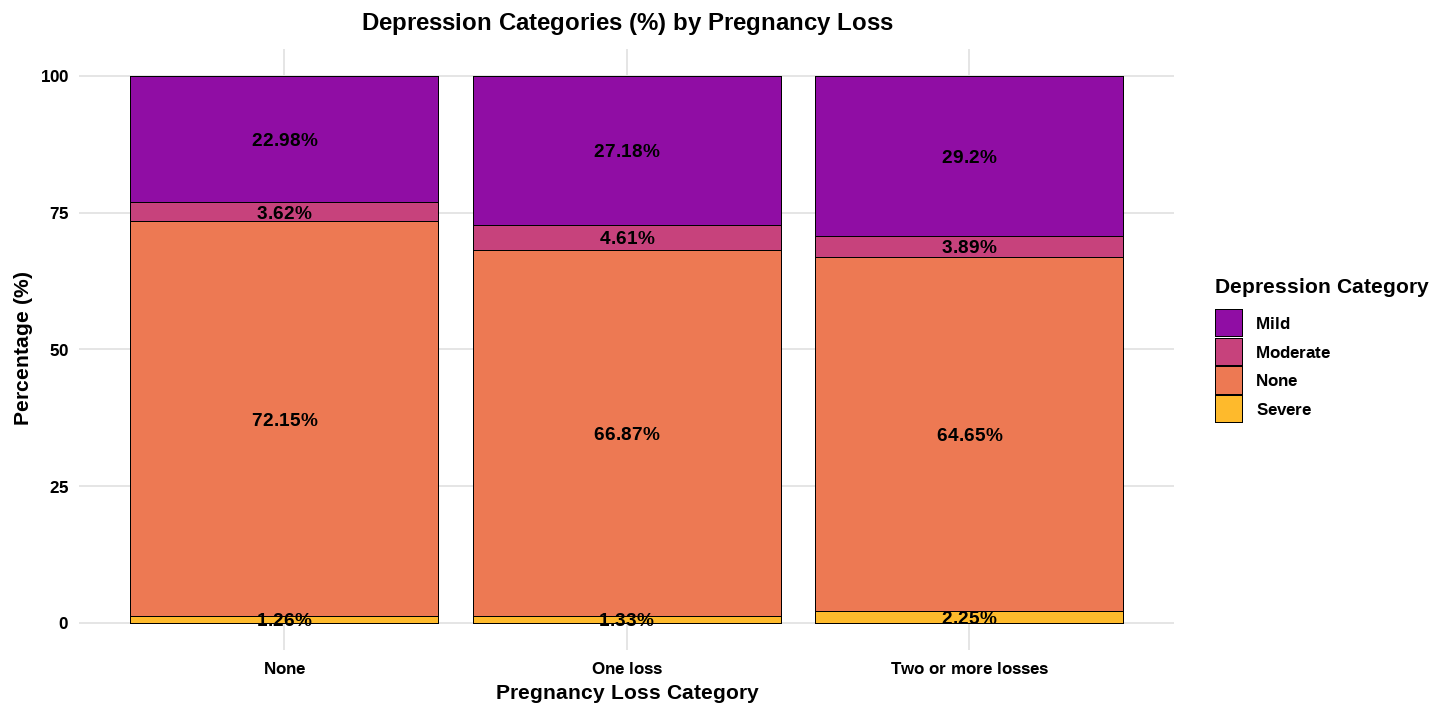


**Supplementary Fig. S2 : Pregnancy Loss by Depression Category**

**Supplementary Fig. S3: Internet Use by Anxiety Category**


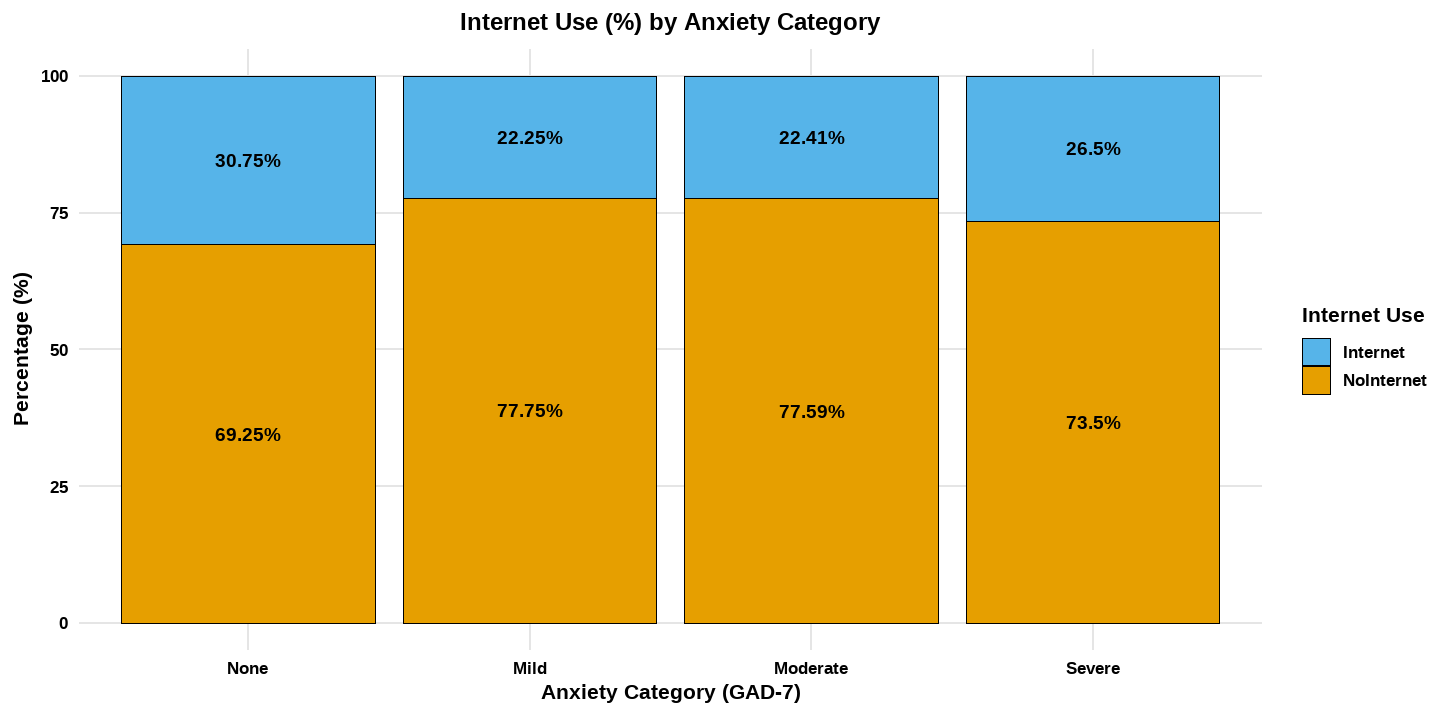


**Supplementary Fig. S4: Pregnancy Loss by Anxiety Category**


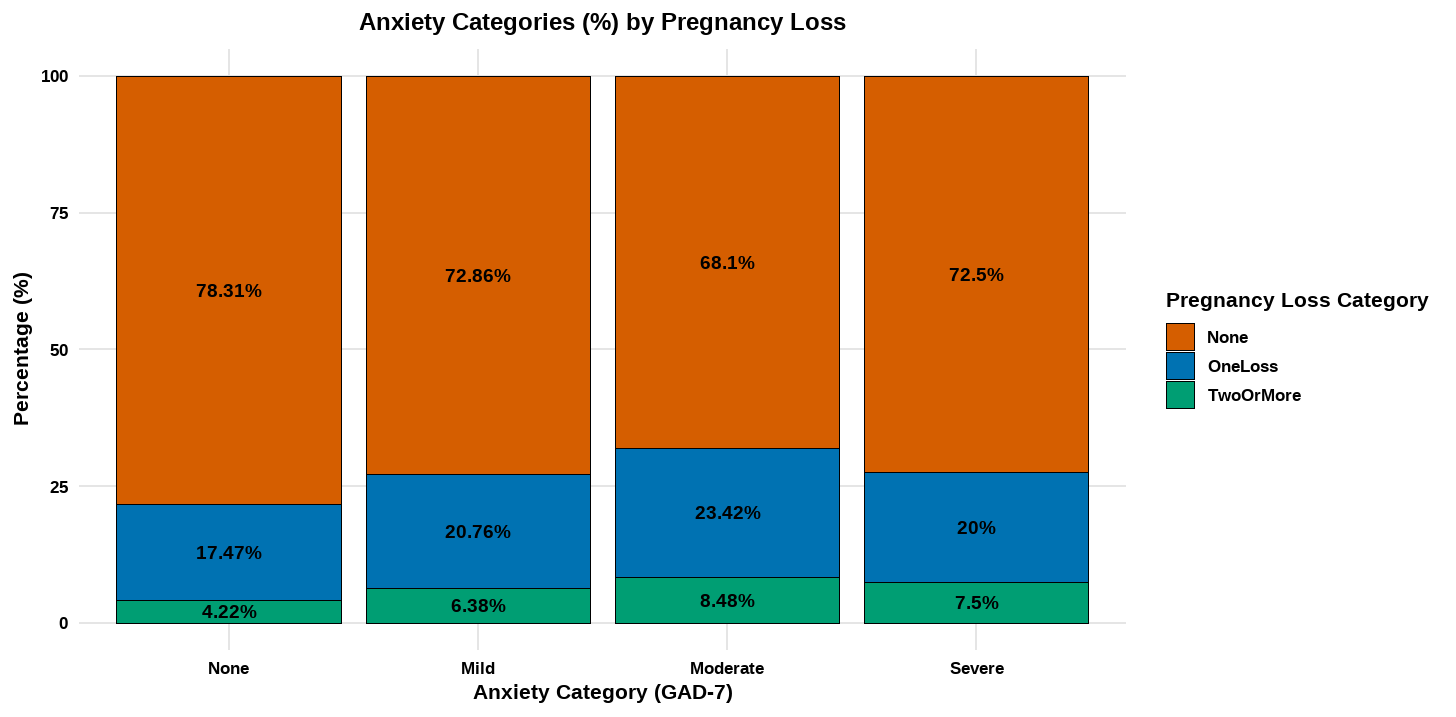


**Supplementary Fig S5: Adjusted Odds Ratios for Anxiety with Internet Use and Its Determinant’s**


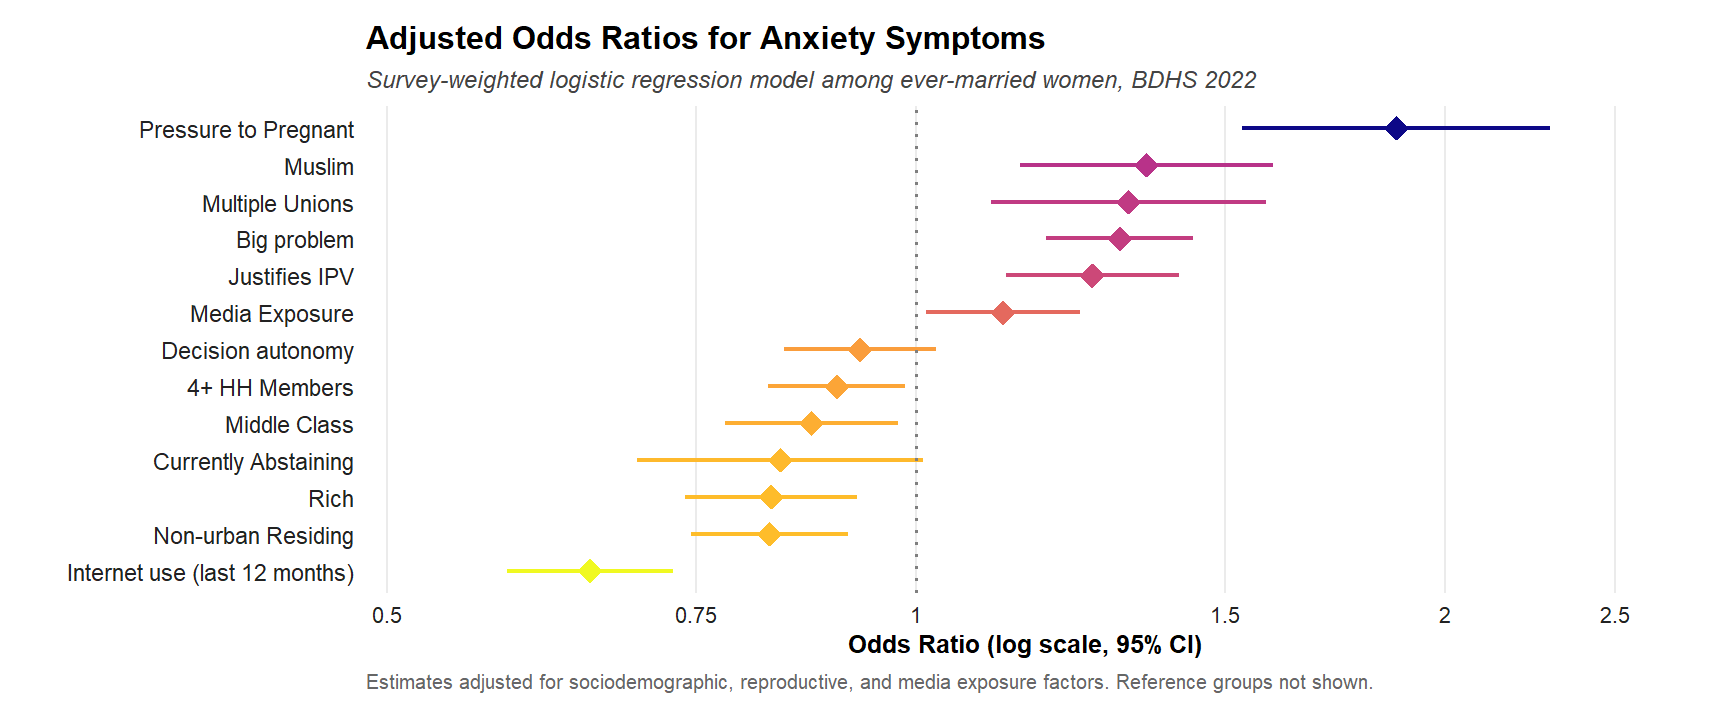


**Supplementary Fig S6: Adjusted Odds Ratios for Anxiety with Pregnancy Loss and Its Determinant’s**


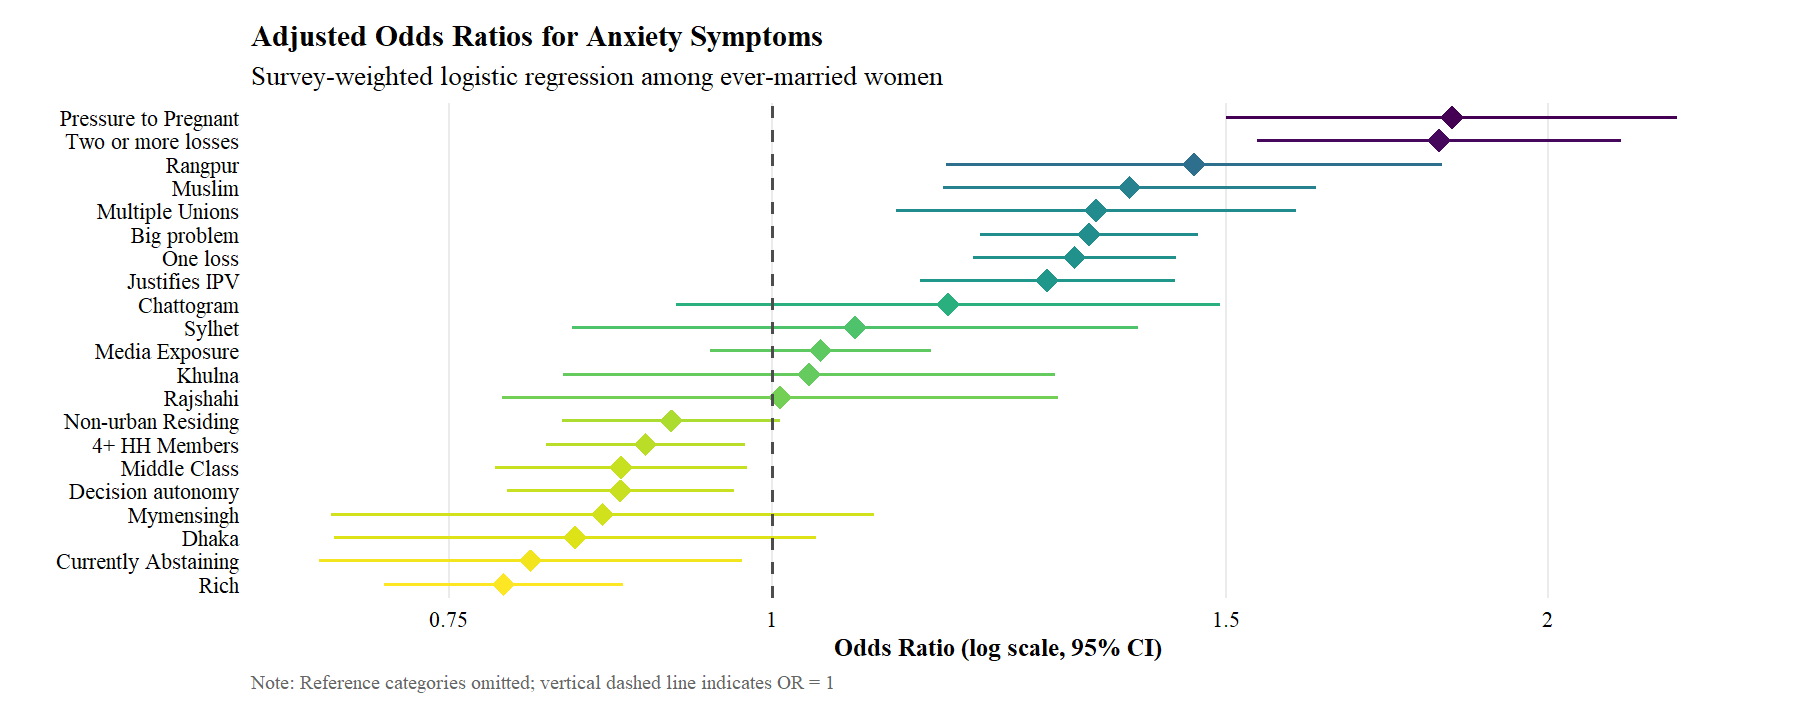


**Supplementary Fig S7: Adjusted Odds Ratios for Depression with Internet Use and Its Determinant’s**


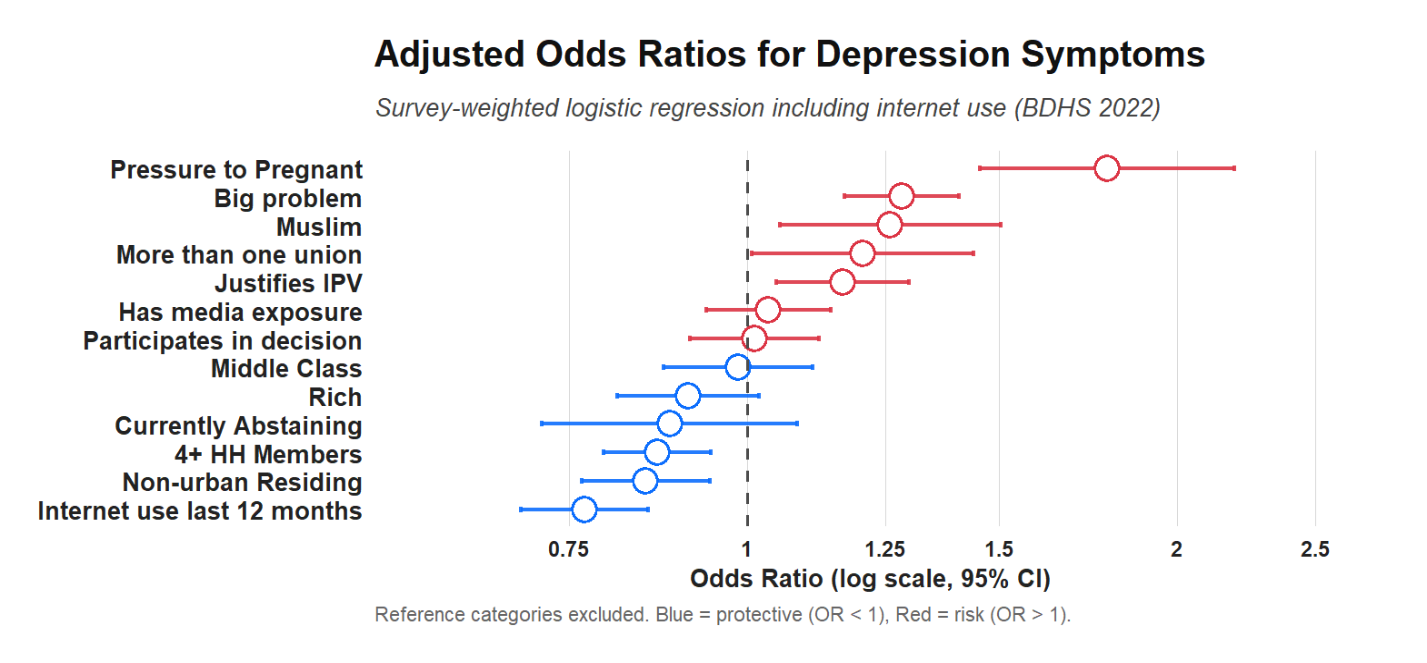


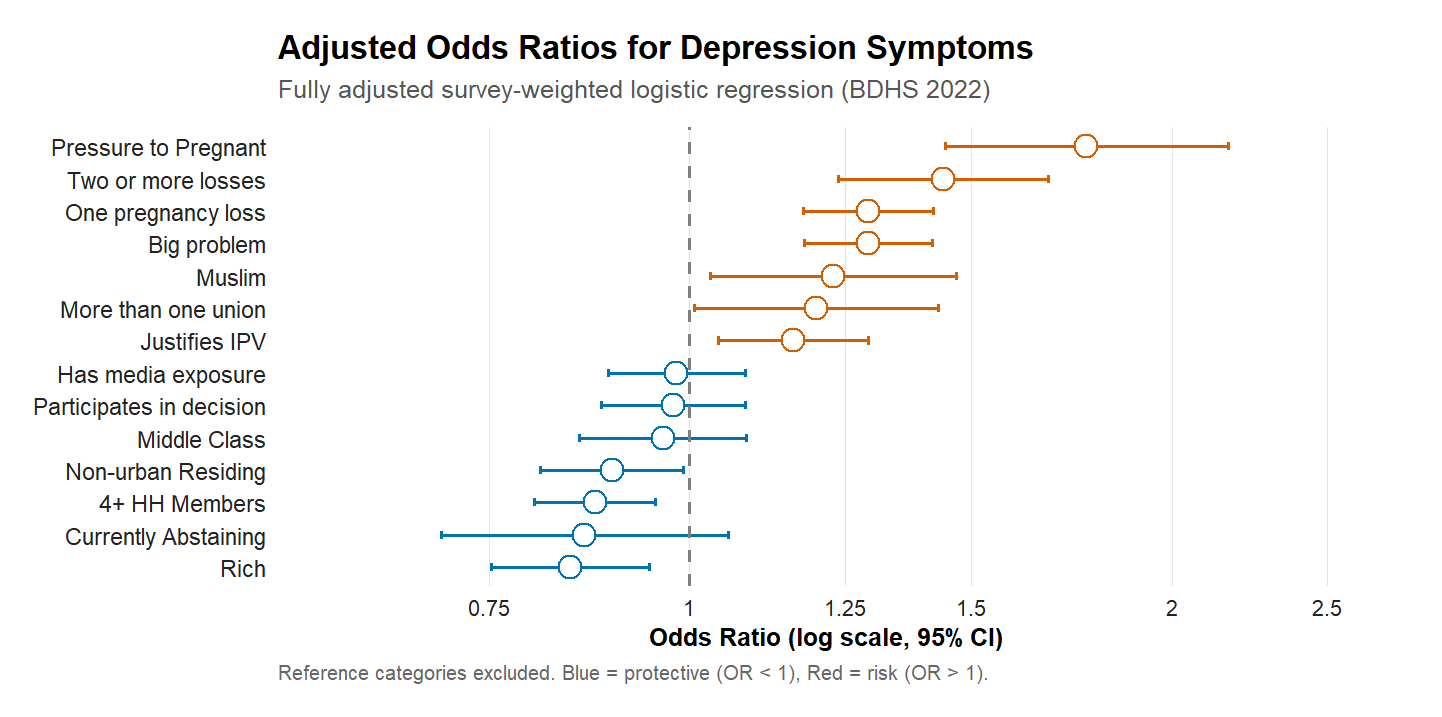


**Supplementary Fig S8: Adjusted Odds Ratios for Depression with Pregnancy Loss and Its Determinant’s**

**Supplementary Fig S8: Adjusted Odds Ratios for Depression with Pregnancy Loss and Its Determinant’s**
