# Supplementary material for: Associations of Internet Use and Pregnancy Loss with Depression and Anxiety among Women in Bangladesh: Evidence from the 2022 BDHS
Source: Research Square preprint supplement (doi:10.21203/rs.3.rs-7546370/v1), 2025-09-19
Supplement: Supplementary file 3 [file b29e6280888486653a250ab1.docx]

**Supplementary Table S1: Descriptive Statistics of Study Variables (N = 19,987)**

| **Variable and Categories** | **Frequency (n)** | **Percentage (%)** |
| --- | --- | --- |
| Anxiety (GAD-7) |  |  |
| None | 14,611 | 73.10 |
| Mild | 4,480 | 22.41 |
| Moderate | 696 | 3.48 |
| Severe | 200 | 1.00 |
| Depression (PHQ-9) |  |  |
| None | 14,153 | 70.81 |
| Mild | 4,808 | 24.06 |
| Moderate | 762 | 3.81 |
| Severe | 264 | 1.32 |
| Pregnancy Loss |  |  |
| None | 15,325 | 76.67 |
| One loss | 3,686 | 18.44 |
| Two or more | 976 | 4.88 |
| Internet Status |  |  |
| No use | 14,288 | 71.49 |
| Yes use | 5.699 | 28.51 |
| Family Planning Exposure |  |  |
| Not Exposed | 11,842 | 59.25 |
| Exposed | 8,145 | 40.75 |
| Pressure to Conceive |  |  |
| No pressure | 19,400 | 97.06 |
| Any pressure | 587 | 2.94 |
| Parity |  |  |
| Low parity | 13,086 | 65.47 |
| High parity (3+) | 6,901 | 34.53 |
| Number of Children |  |  |
| None | 2,169 | 10.85 |
| 1-2 | 11,747 | 58.78 |
| 3+ | 6,071 | 30.37 |
| Living Children (Binary) |  |  |
| Lower (0-2) | 13,916 | 69.63 |
| High (3+) | 6,071 | 30.37 |
| Menstrual Status |  |  |
| Not menstruated | 6,051 | 30.27 |
| Menstruated | 13,936 | 69.73 |
| Cesarean Section |  |  |
| No | 2,766 | 13.84 |
| Yes | 2,277 | 11.39 |
| Missing | 14,944 | 74.77 |
| Decision Autonomy |  |  |
| No participation | 3,364 | 16.83 |
| Participates | 16,623 | 83.17 |
| IPV Justification |  |  |
| Does not Justifies | 17,380 | 86.95 |
| Justifies | 2,607 | 13.05 |
| Number of Unions |  |  |
| Once | 19,286 | 96.49 |
| More than once | 701 | 3.51 |
| Sexual Abstinence |  |  |
| Not Abstaining | 19,246 | 96.29 |
| Abstaining | 741 | 3.71 |
| Age Group |  |  |
| 15-19 | 1,635 | 8.18 |
| 20-24 | 3,233 | 16.17 |
| 25-29 | 3,539 | 17.70 |
| 30-34 | 3,438 | 17.20 |
| 35-39 | 3,362 | 16.82 |
| 40-44 | 2,561 | 12.81 |
| 45-49 | 2,219 | 11.10 |
| Education |  |  |
| None | 7,928 | 39.66 |
| Secondary incomplete | 9,136 | 45.71 |
| Secondary complete | 2,923 | 14.63 |
| Father’s Education |  |  |
| None | 2,722 | 13.62 |
| Primary incomplete | 2,563 | 12.82 |
| Primary complete | 2,712 | 13.57 |
| Secondary incomplete | 6,866 | 34.35 |
| Secondary complete | 5,124 | 25.64 |
| Wealth Category |  |  |
| Poor | 7,502 | 37.53 |
| Middle | 3,989 | 19.96 |
| Rich | 8,496 | 42.51 |
| Religion |  |  |
| Non-Muslim | 2,059 | 10.30 |
| Muslim | 17,928 | 89.70 |
| Household Head |  |  |
| Male | 17,093 | 85.52 |
| Female | 2,894 | 14.48 |
| Employment |  |  |
| Not working | 13,812 | 69.10 |
| Working | 6,175 | 30.90 |
| Household Size |  |  |
| 1-3 members | 4,528 | 22.65 |
| 4+ members | 15,459 | 77.35 |
| Residing Migrants |  |  |
| None | 3,886 | 19.44 |
| Yes | 16,101 | 80.56 |
| Residence Type |  |  |
| Urban | 7,007 | 35.06 |
| Rural | 12,980 | 64.94 |
| Division |  |  |
| Barisal | 2,117 | 10.59 |
| Chattogram | 2,983 | 14.92 |
| Dhaka | 3,028 | 15.15 |
| Khulna | 2,602 | 13.02 |
| Mymensingh | 2,156 | 10.79 |
| Rajshahi | 2,546 | 12.74 |
| Rangpur | 2,399 | 12.00 |
| Sylhet | 2,156 | 10.79 |
| Media Exposure |  |  |
| None | 3,689 | 18.46 |
| Yes | 16,298 | 81.54 |
| Healthcare |  |  |
| No Problem | 9,185 | 45.96 |
| Big problem | 10,802 | 54.04 |

**Note: Frequencies (n) and percentages (%) are shown for all variables.**

***Supplementary Table S2: Logistic Regression Results: Odds Ratios for Anxiety and Depression***

|  | | **Anxiety** |  |  |  | **Depression** |  |
| --- | --- | --- | --- | --- | --- | --- | --- |
| **Variables** | **OR** | **95% CI** | **p-value** |  | **OR** | **95% CI** | **p-value** |
| **Pregnancy Loss**  No loss (ref) | 1.00 | — | — |  | 1.00 | — | — |
| One loss | 1.31 | [1.20, 1.43] | **<0.001** |  | 1.29 | [1.18, 1.41] | **<0.001** |
| Two or more losses | 1.82 | [1.55, 2.13] | **<0.001** |  | 1.45 | [1.25, 1.69] | **<0.001** |
| **IPV Justification** |  |  |  |  |  |  |  |
| Does not justify (ref) | 1.00 | — | — | 1.00 | | — | — |
| Justifies IPV | 1.37 | [1.22, 1.54] | **<0.001** | 1.25 | | [1.12, 1.39] | **<0.001** |
| **Currently Abstaining** |  |  |  |  |  |  |  |
| No (ref) | 1.00 | — | — | 1.00 | | — | — |
| Yes | 0.81 | [0.67, 0.98] | 0.027 | 0.86 | | [0.70, 1.06] | .161 |
| **Decision Autonomy** |  |  |  |  |  |  |  |
| Does not participate (ref) | 1.00 | — | — | 1.00 | | — | — |
| Participates in decision | 0.83 | [0.75, 0.91] | <0.001 | 0.92 | | [0.83, 1.02] | .109 |
| **Any Big Problem** |  |  |  |  |  |  |  |
| No big problem (ref) | 1.00 | — | — | 1.00 | | — | — |
| Big problem | 1.37 | [1.25, 1.51] | **<0.001** | 1.32 | | [1.20, 1.45] | **<0.001** |
| **C-section**a |  |  |  |  |  |  |  |
| No C-section (ref) | 1.00 | — | — | 1.00 | | — | — |
| C-section | 0.75 | [0.64, 0.88] | **<0.001** | 0.82 | | [0.69, 0.96] | .015 |
| **Religion** |  |  |  |  |  |  |  |
| Non-Muslim (ref) | 1.00 | — | — | 1.00 | | — | — |
| Muslim | 1.34 | [1.14, 1.58] | **<0.001** | 1.26 | | [1.06, 1.51] | .011 |
| **Wealth Category** |  |  |  |  |  |  |  |
| Poor (ref) | 1.00 | — | — | 1.00 | | — | — |
| Middle Class | 0.84 | [0.75, 0.94] | 0.003 | 0.96 | | [0.85, 1.08] | .480 |
| Rich | 0.72 | [0.65, 0.80] | **<0.001** | 0.82 | | [0.74, 0.92] | .001 |
| **Household Size** |  |  |  |  |  |  |  |
| Less than 4 members (ref) | 1.00 | — | — | 1.00 | | — | — |
| 4 or more members | 0.88 | [0.80, 0.96] | 0.003 | 0.85 | | [0.78, 0.92] | <0.001 |
| **Pressure to Get Pregnant** |  |  |  |  |  |  |  |
| No pressure (ref) | 1.00 | — | — | 1.00 | | — | — |
| Any pressure | 1.93 | [1.59, 2.34] | **<0.001** | 1.83 | | [1.49, 2.24] | <0.001 |
| **Residing Status**  Lives with husband (ref) | 1.00 | — | — | 1.00 | | — | — |
| Lives elsewhere | 0.90 | [0.82, 0.99] | .034 | 0.91 | | [0.82, 0.99] | .036 |
| **Number of Unions**  Once (ref) | 1.00 | — | — | 1.00 | | — | — |
| More than once | 1.49 | [1.25, 1.78] | **<0.001** | 1.33 | | [1.11, 1.58] | .002 |

| **Division**  Barisal (ref) | 1.00 | — | — |  | 1.00 | — | — |
| --- | --- | --- | --- | --- | --- | --- | --- |
| Chattogram | 1.11 | [0.87, 1.41] | .392 |  | 1.06 | [0.84, 1.34] | .604 |
| Dhaka | 0.77 | [0.62, 0.95] | .014 |  | 0.82 | [0.68, 0.99] | .044 |
| Khulna | 0.97 | [0.78, 1.21] | .794 |  | 1.04 | [0.87, 1.25] | .652 |
| Mymensingh | 0.87 | [0.68, 1.10] | .240 |  | 0.82 | [0.65, 1.04] | .096 |
| Rajshahi | 0.98 | [0.77, 1.25] | .874 |  | 0.99 | [0.82, 1.21] | .950 |
| Rangpur | 1.38 | [1.11, 1.71] | .004 |  | 1.30 | [1.06, 1.58] | .011 |
| Sylhet | 1.03 | [0.80, 1.33] | .803 |  | 0.92 | [0.71, 1.18] | .495 |
| **Area** |  |  |  |  |  |  |  |
| Urban (ref) | 1.00 | — | — | 1.00 | | — | — |
| Rural | 1.13 | [0.99, 1.28] | .078 | 1.09 | | [0.95, 1.26] | .216 |

*Note.* OR = Odds Ratio; CI = Confidence Interval; IPV = Intimate Partner Violence. All models were estimated using survey weights with design-based standard errors accounting for stratification and clustering.

a C-section analysis based on subsample of 5,043 observations.
